# Supplementary material for: The effect of cooperative hydrogen bonding on the OH stretching-band shift for water clusters studied by matrix-isolation infrared spectroscopy and density functional theory
Source: Royal Society of Chemistry journal article supplement (doi:10.1039/b506641g), 2005-01-01
Supplement: b506641g.pdf [file b506641g.pdf]

**S2** Calculated OH stretching wavenumbers (cm<sup>-1</sup>), intensities (km mol<sup>-1</sup>) and assignments of the water clusters (H<sub>2</sub>O)<sub>n</sub> with n = 1–5 and cyclic hexmers.<sup>a</sup> Anharmonic wavenumber calculated by the B3LYP/6-311++G(d,p) method is given in parentheses

| $\nu$           | Int <sup>b</sup> | $\nu$             | Int <sup>b</sup> | $\nu$             | Int <sup>b</sup> | $\nu$                  | Int <sup>b</sup> | $\nu$                 | Int <sup>b</sup> | Assignment <sup>c</sup> | $M_{OH}^c$ |
|-----------------|------------------|-------------------|------------------|-------------------|------------------|------------------------|------------------|-----------------------|------------------|-------------------------|------------|
| <b>Monomer</b>  |                  | <b>Dimer</b>      |                  | <b>Trimer 1</b>   |                  | <b>Trimer 2</b>        |                  |                       |                  |                         |            |
| 3721 (3736)     | 57               | 3716 (3730)       | 86               | 3706              | 99               | 3716                   | 87               |                       |                  | free $\nu_a$            |            |
| 3644 (3643)     | 9                | 3644 (3641)       | 16               | 3635              | 9                | 3643                   | 13               |                       |                  | free $\nu_s$            |            |
|                 |                  | 3700 (3696)       | 80               | 3704              | 7                | 3716                   | 68               |                       |                  | free                    |            |
|                 |                  |                   |                  | 3702              | 172              | 3646                   | 14               |                       |                  | free                    |            |
|                 |                  |                   |                  | 3604              | 137              |                        |                  |                       |                  | 00DA01                  | -1         |
|                 |                  |                   |                  | 3597              | 246              |                        |                  |                       |                  | 00DA01                  | -1         |
|                 |                  |                   |                  |                   |                  | 3628                   | 544              |                       |                  | 10DA00                  | -1         |
|                 |                  |                   |                  |                   |                  | 3571                   | 94               |                       |                  | 10DA00                  | -1         |
|                 |                  | 3564 (3541)       | 332              |                   |                  |                        |                  |                       |                  | 00DA00                  | 0          |
| <b>c-Trimer</b> |                  | <b>c-Tetramer</b> |                  | <b>c-Pentamer</b> |                  | <b>c-Hexamer Chair</b> |                  | <b>c-Hexamer Boat</b> |                  |                         |            |
| 3701 (3707)     | 49               | 3695 (3692)       | 2                | 3698 (3719)       | 78               | 3696 (3700)            | 10               | 3702                  | 69               | free                    |            |
| 3701 (3705)     | 97               | 3694 (3692)       | 90               | 3697 (3709)       | 49               | 3696 (3701)            | 93               | 3701                  | 75               | free                    |            |
| 3697 (3715)     | 90               | 3694 (3693)       | 89               | 3696 (3699)       | 57               | 3695 (3700)            | 103              | 3699                  | 57               | free                    |            |
|                 |                  | 3694 (3690)       | 98               | 3694 (3691)       | 76               | 3695 (3698)            | 22               | 3698                  | 58               | free                    |            |
|                 |                  |                   |                  | 3693 (3711)       | 73               | 3695 (3718)            | 86               | 3694                  | 93               | free                    |            |
|                 |                  |                   |                  |                   |                  | 3694 (3717)            | 86               | 3694                  | 47               | free                    |            |
| 3507 (3458)     | 528              | 3416 (3326)       | 18               | 3391 (3292)       | 40               | 3387 (3283)            | 159              | 3399                  | 170              | 01DA10                  | 2          |
| 3499 (3447)     | 573              | 3388 (3294)       | 1465             | 3384 (3284)       | 76               | 3374 (3267)            | 1                | 3391                  | 36               | 01DA10                  | 2          |
| 3455 (3401)     | 18               | 3387 (3294)       | 1466             | 3349 (3275)       | 2139             | 3373 (3274)            | 3                | 3375                  | 240              | 01DA10                  | 2          |
|                 |                  | 3315 (3299)       | 0                | 3343 (3258)       | 2204             | 3327 (3282)            | 2840             | 3345                  | 2358             | 01DA10                  | 2          |
|                 |                  |                   |                  | 3277 (3123)       | 27               | 3327 (3294)            | 2883             | 3329                  | 2878             | 01DA10                  | 2          |
|                 |                  |                   |                  |                   |                  | 3266 (3156)            | 1                | 3279                  | 10               | 01DA10                  | 2          |

<sup>a</sup> Harmonic wavenumbers calculated by the B3LYP/6-311++G(d,p) method are scaled by the formula;  $\nu_{calc} = \nu_{harm}(1.184 - 0.00006 \times \nu_{harm})$ .

<sup>b</sup> Int: Infrared intensity, km mol<sup>-1</sup>.

<sup>c</sup> See text.

**S3** Calculated OH stretching wavenumbers ( $\text{cm}^{-1}$ ), intensities ( $\text{km mol}^{-1}$ ) and assignments of the water clusters  $(\text{H}_2\text{O})_n$  with  $n = 6,7^a$  except cyclic hexmers

| $\nu$                 | $\text{Int}^b$ | $\nu$                | $\text{Int}^b$ | $\nu$               | $\text{Int}^b$ | $\nu$                | $\text{Int}^b$ | $\nu$                 | $\text{Int}^b$ | Assignment <sup>c</sup> | $M_{\text{OH}}^c$ |
|-----------------------|----------------|----------------------|----------------|---------------------|----------------|----------------------|----------------|-----------------------|----------------|-------------------------|-------------------|
| <b>Hexamer Bag 1</b>  |                | <b>Hexamer Bag 2</b> |                | <b>Hexamer Cage</b> |                | <b>Hexamer Prism</b> |                | <b>Hexamer Book 1</b> |                |                         |                   |
| 3701                  | 102            | 3704                 | 76             | 3702                | 68             | 3694                 | 54             | 3697                  | 67             | free                    |                   |
| 3699                  | 60             | 3702                 | 78             | 3695                | 71             | 3694                 | 118            | 3696                  | 71             | free                    |                   |
| 3697                  | 60             | 3695                 | 81             | 3694                | 76             | 3693                 | 46             | 3695                  | 75             | free                    |                   |
| 3689                  | 78             | 3689                 | 61             | 3690                | 62             |                      |                | 3692                  | 68             | free                    |                   |
| 3687                  | 47             |                      |                |                     |                |                      |                | 3688                  | 66             | free                    |                   |
|                       |                | 3618                 | 315            | 3595                | 400            | 3659                 | 121            | 3574                  | 412            | 11DA11                  | 0                 |
|                       |                | 3608                 | 62             | 3571                | 316            | 3614                 | 324            |                       |                | 11DA11                  | 0                 |
|                       |                |                      |                | 3542                | 167            | 3604                 | 30             |                       |                | 11DA11                  | 0                 |
|                       |                |                      |                |                     |                | 3563                 | 243            |                       |                | 11DA11                  | 0                 |
| 3543                  | 631            |                      |                |                     |                |                      |                | 3474                  | 299            | 11DA10                  | 1                 |
| 3516                  | 125            | 3534                 | 250            |                     |                |                      |                |                       |                | 11DA10                  | 1                 |
|                       |                |                      |                | 3479                | 474            |                      |                |                       |                | 11DA10                  | 1                 |
| 3501                  | 679            | 3511                 | 567            | 3427                | 601            |                      |                | 3460                  | 828            | 01DA11                  | 1                 |
| 3474                  | 169            |                      |                |                     |                |                      |                |                       |                | 01DA11                  | 1                 |
|                       |                |                      |                |                     |                | 3497                 | 466            |                       |                | 11DA20                  | 2                 |
| 3303                  | 664            |                      |                |                     |                |                      |                | 3417                  | 360            | 01DA10                  | 2                 |
|                       |                | 3468                 | 364            |                     |                | 3460                 | 431            |                       |                | 02DA11                  | 2                 |
|                       |                |                      |                |                     |                | 3401                 | 435            |                       |                | 02DA11                  | 2                 |
|                       |                | 3434                 | 426            |                     |                | =                    |                |                       |                | 11DA20                  | 2                 |
|                       |                |                      |                |                     |                | 3401                 | 576            |                       |                | 11DA20                  | 2                 |
|                       |                |                      |                |                     |                |                      |                | 3335                  | 681            | 01DA10                  | 2                 |
| 3241                  | 1821           | 3270                 | 1169           | 3391                | 597            |                      |                | 3279                  | 2162           | 01DA20                  | 3                 |
| 3162                  | 723            | 3194                 | 826            | 3358                | 696            |                      |                | 3221                  | 217            | 02DA10                  | 3                 |
|                       |                |                      |                | 3174                | 827            | 3130                 | 1031           |                       |                | 02DA20                  | 4                 |
| <b>Hexamer Book 2</b> |                | <b>Heptamer 1</b>    |                | <b>Heptamer 2</b>   |                | <b>Heptamer 3</b>    |                | <b>Heptamer 4</b>     |                |                         |                   |
| 3701                  | 76             | 3715                 | 91             | 3701                | 73             | 3714                 | 90             | 3701                  | 78             | free                    |                   |
| 3701                  | 73             | 3696                 | 53             | 3698                | 88             | 3702                 | 72             | 3699                  | 89             | free                    |                   |
| 3698                  | 73             | 3696                 | 67             | 3696                | 65             | 3699                 | 22             | 3699                  | 70             | free                    |                   |
| 3691                  | 72             | 3695                 | 70             | 3694                | 74             | 3699                 | 108            | 3698                  | 72             | free                    |                   |
| 3684                  | 65             | 3692                 | 66             | 3686                | 67             | 3690                 | 69             | 3691                  | 83             | free                    |                   |
|                       |                | 3643                 | 16             |                     |                | 3642                 | 17             | 3683                  | 67             | free                    |                   |
|                       |                | 3547                 | 219            |                     |                | 3540                 | 395            |                       |                | 12DA00                  | 1                 |
|                       |                | 3520                 | 1047           | 3516                | 409            |                      |                |                       |                | 11DA21                  | 1                 |
|                       |                |                      |                |                     |                |                      |                | 3522                  | 316            | 00DA21                  | 1                 |
| 3495                  | 667            | 3478                 | 311            | 3591                | 236            |                      |                |                       |                | 11DA10                  | 1                 |
|                       |                |                      |                | 3537                | 519            |                      |                |                       |                | 12DA11                  | 1                 |
| 3474                  | 679            |                      |                |                     |                |                      |                | 3488                  | 392            | 01DA11                  | 1                 |
| 3461                  | 851            |                      |                | 3466                | 284            |                      |                |                       |                | 01DA11                  | 1                 |
| 3454                  | 397            |                      |                |                     |                | 3508                 | 815            |                       |                | 11DA10                  | 1                 |
|                       |                |                      |                |                     |                | 3470                 | 384            |                       |                | 11DA10                  | 1                 |
|                       |                |                      |                |                     |                |                      |                | 3474                  | 272            | 01DA11                  | 1                 |
|                       |                |                      |                |                     |                |                      |                |                       |                | 11DA10                  | 1                 |
| 3430                  | 608            | 3432                 | 689            | 3407                | 443            | 3446                 | 683            | 3453                  | 1020           | 01DA10                  | 2                 |
| 3407                  | 318            | 3366                 | 1039           |                     |                | 3426                 | 576            | 3436                  | 1195           | 01DA10                  | 2                 |
|                       |                | 3391                 | 246            | 3489                | 121            | 3398                 | 902            |                       |                | 01DA21                  | 2                 |
|                       |                |                      |                | 3443                | 1287           |                      |                |                       |                | 12DA10                  | 2                 |
|                       |                | 3327                 | 1461           |                     |                |                      |                | 3391                  | 472            | 12DA10                  | 2                 |
|                       |                |                      |                |                     |                |                      |                | 3378                  | 637            | 12DA10                  | 2                 |
|                       |                | 3238                 | 601            | 3288                | 1081           | 3358                 | 752            |                       |                | 01DA21                  | 2                 |
|                       |                |                      |                | 3206                | 985            |                      |                |                       |                | 01DA20                  | 3                 |
|                       |                |                      |                |                     |                |                      |                |                       |                | 02DA10                  | 3                 |
|                       |                |                      |                |                     |                | 3134                 | 901            |                       |                | 12DA20                  | 3                 |
|                       |                |                      |                |                     |                |                      |                | 3113                  | 1042           | 02DA21                  | 3                 |
| 2987                  | 1254           |                      |                |                     |                |                      |                |                       |                | 02DA20                  | 4                 |

<sup>a</sup> Harmonic wavenumbers calculated by the B3LYP/6-311++G(d,p) method are scaled by the formula;  $\nu_{\text{calc}} = \nu_{\text{harm}}(1.184 - 0.00006 \times \nu_{\text{harm}})$ .

<sup>b</sup> Int: Infrared intensity,  $\text{km mol}^{-1}$ .

<sup>c</sup> See text.
